# Supplementary material for: Loss of DIP2C in RKO cells stimulates changes in DNA methylation and epithelial-mesenchymal transition
Source: Springer Nature journal article supplement (doi:10.1186/s12885-017-3472-5), 2017-07-17
Supplement: MOESM1 [file 13309850]

## ADDITIONAL FILE 2

### Loss of *DIP2C* in RKO Cells Stimulates Changes in DNA Methylation and Epithelial-Mesenchymal Transition

Chatarina Larsson, Muhammad Akhtar Ali, Tatjana Pandzic, Anders M. Lindroth, Liquan He, and Tobias Sjöblom

- Supplementary Table 1** Primers for generation and validation of isogenic *DIP2C* cell lines and *DIP2C* overexpressing cells. Primers are indicated by their number in the text. Primers were purchased from Sigma Aldrich.
- Supplementary Table 2** Primers for RT-qPCR. Primer pairs for amplification of the transcript indicated by the respective name. Primers were purchased from Sigma Aldrich.
- Supplementary Table 8** Summary of DNA methylation analysis in *DIP2C*<sup>-/-</sup> cells.
- Supplementary Table 9** Genes with change in methylation ( $\text{beta diff} \geq |0.3|$ ) at promoter sites and gene expression ( $\log_2 \text{ fold change} \geq |2|$ ) in *DIP2C*<sup>-/-</sup> #1-1 compared to RKO.

**Supplementary Table 1. Primers for generation and validation of isogenic DIP2C cell lines and DIP2C overexpressing cells.** Primers are indicated by their number in the text. Primers were purchased from Sigma Aldrich.

| Primer no. | Name              | Sequence (5' – 3')                                       |
|------------|-------------------|----------------------------------------------------------|
| 1          | P1:HA1F not1      | TCAGGAGCGGCCGCTTGACTACTGAGACGCTCTGG                      |
| 2          | P2:HA1R xba1(scr) | TCAGGATCTAGATGTGTAACCTACCAGGTAGAGTTGCGACCTTCATACTTCTTGCC |
| 3          | P3:HA2F xho1      | TCAGGACTCGAGCCTGGAGATAGGGTAAGTGC                         |
| 4          | P4:HA2R not1      | TCAGGAGCGGCCGAGAGGCCAAACGTGTTCAAT                        |
| 5          | AAV-Neo F         | GCCTTTTGCTCACATGTCCT                                     |
| 6          | AAV-Neo R         | AGGGAGTACTCACCCAACA                                      |
| 7          | Neo-AAV F         | TCGCCTTCTTGACGAGTTCT                                     |
| 8          | Neo-AAV R         | TGACGTATGCGGTGTGAAAT                                     |
| 9          | Screening F       | AAACAGTGATGGTACTGAAATAGAAA                               |
| 10         | Screening R       | TGTGTAACCTACCAGGTAGCAGTT                                 |
| 11         | Cre scr F         | CATGATACGCAGGAAGCAGA                                     |
| 12         | Cre scr R         | GGGGGCATCTAAAGCACATA                                     |
| 13         | ORF 5' scr F      | GATCCGGTACCGAGGAGAT                                      |
| 14         | ORF 5' scr R      | TGAACACATGATGGCTCCAG                                     |
| 15         | ORF 3' scr F      | AGATGGATGGCCTCATGGT                                      |
| 16         | ORF 3' scr R      | TTGCTGCCAGATCCTCTTCT                                     |

**Supplementary Table 2. Primers for RT-qPCR.** Primer pairs for amplification of the transcript indicated by the respective name. Primers were purchased from Sigma Aldrich.

| Primer name | Sequence                 | Used for                      |
|-------------|--------------------------|-------------------------------|
| DIP2C F     | TGCCTAAGCCTCGACAGAAG     | DIP2C quantification          |
| DIP2C R     | TTCCCAGAGACCAGGTTCC      | DIP2C quantification          |
| TBP F       | CGGCTGTTTAACTTCGCTTC     | Reference gene                |
| TBP R       | CACACGCCAAGAAACAGTGA     | Reference gene                |
| CALB2 F     | AAAAACTCAGATGGGAAAATCG   | RNA seq validation            |
| CALB2 R     | TCTCTCGGTTGGCAGGA        | RNA seq validation            |
| CDKN2A F    | GTGGACCTGGCTGAGGAG       | RNA seq validation            |
| CDKN2A R    | CTTTCAATCGGGGATGTCTG     | RNA seq validation            |
| DCDC2 F     | GAATTCACAAGAAACCATTCCAA  | RNA seq validation            |
| DCDC2 R     | CCCCGTGTTTCAGACCTC       | RNA seq validation            |
| DCLK1 F     | AAGTCTGCAGCTCGATGGAT     | RNA seq validation            |
| DCLK1 R     | AGCCTTCCTCCGACACTTCT     | RNA seq validation            |
| GRPR F      | CCCGTGGAAGGGAATATACA     | RNA seq validation            |
| GRPR R      | GCGGTACAGGTAGATGACATGAT  | RNA seq validation            |
| HGF F       | CAGCATGTCCTCCTGCATC      | RNA seq validation            |
| HGF R       | TCTTTTCCTTTGTCCTCTGC     | RNA seq validation            |
| IL13RA2 F   | TCTTGAAACCTGGCATAGGTG    | RNA seq validation            |
| IL13RA2 R   | GCCTCCAAATAGGGAAATCTGC   | RNA seq validation            |
| MAP1B F     | GACGCTTTGTTGGAAGGAAA     | RNA seq validation            |
| MAP1B R     | CTGAGTCATGAGTTGGGATCAG   | RNA seq validation            |
| RGS4 F      | CGGCTCTTGCTTGAGGA        | RNA seq validation            |
| RGS4 R      | GGGAAGAATTGTGTTACAGG     | RNA seq validation            |
| SLC1A3 F    | AGCACTCATCACCGCTCTG      | RNA seq validation            |
| SLC1A3 R    | GTCCACGCCATTGTTCTCTT     | RNA seq validation            |
| TNS4 F      | GATGTCAGCTATATGTTTGAAGC  | RNA seq validation            |
| TNS4 R      | GGATCTGGAAGATGACTGATGG   | RNA seq validation            |
| UCA1 F      | CCCAAGGAACATCTCACCAA     | RNA seq validation            |
| UCA1 R      | GATGGTCCAAGGGGCTTC       | RNA seq validation            |
| P14 F       | CCCTCGTGCTGATGCTACTG     | RNA seq validation/senescence |
| P14 R       | CATCATGACCTGGTCTTCTAGGAA | RNA seq validation/senescence |
| P16 F       | GGGGCACCAGAGGCAGT        | RNA seq validation/senescence |
| P16 R       | GGTTGTGGCGGGGGCAGTT      | RNA seq validation/senescence |
| CD24 F      | CACGCAGATTTATTCCAGTGAAC  | EMT gene set qPCR             |
| CD24 R      | GACCACGAAGAGACTGGCTGTT   | EMT gene set qPCR             |
| CD44 F      | CCAGAAGGAACAGTGGTTTGGC   | EMT gene set qPCR             |
| CD44 R      | ACTGTCCTCTGGGCTTGGTGT    | EMT gene set qPCR             |
| CDH1 F      | GCCTCCTGAAAAGAGAGTGGAAG  | EMT gene set qPCR             |
| CDH1 R      | TGGCAGTGTCTCTCAAATCCG    | EMT gene set qPCR             |
| CDH2 F      | CCTCCAGAGTTTACTGCCATGAC  | EMT gene set qPCR             |
| CDH2 R      | GTAGGATCTCCGCACTGATTC    | EMT gene set qPCR             |
| VIM F       | AGGCAAAGCAGGAGTCCACTGA   | EMT gene set qPCR             |
| VIM R       | ATCTGGCGTTCCAGGGACTCAT   | EMT gene set qPCR             |
| ZEB1 F      | TCAGTGCAGTCTTCTGAACCA    | EMT gene set qPCR             |
| ZEB1 R      | GAGGCTGATCATTGTTCTTGG    | EMT gene set qPCR             |

**Supplementary Table 8. Summary of DNA methylation analysis in *DIP2C*<sup>-/-</sup> cells.**

| Ref gene group                              | Genes with DNA methylation data | Hypo-methylated <sup>1</sup> | Hyper-methylated <sup>1</sup> | Genes with DNA methylation and RNA seq data | Pearson's r all genes <sup>2</sup><br>(p value) | Pearson's r for genes with beta diff ≥  0.3  <sup>3</sup><br>(p value) |
|---------------------------------------------|---------------------------------|------------------------------|-------------------------------|---------------------------------------------|-------------------------------------------------|------------------------------------------------------------------------|
| Gene body                                   | 19 545                          | 385                          | 194                           | 2 316                                       | -0.042<br>(p=0.0419)                            | -0.109<br>(p=0.356)                                                    |
| Promoter (TSS1500, TSS200, 5'UTR, 1st exon) | 20 964                          | 284                          | 236                           | 2 424                                       | -0.278<br>(p<2.2×10 <sup>-16</sup> )            | -0.663<br>(p=2.196×10 <sup>-10</sup> )                                 |

Data are based on *DIP2C*<sup>-/-</sup> #1-1.

<sup>1</sup>Hypomethylated genes - beta diff ≤ -0.3; hypermethylated genes - beta diff ≥ 0.3.

<sup>2</sup>Pearson's product-moment correlation calculated in R describing correlation between change in DNA methylation and change in RNA expression for all genes with both DNA methylation and RNA sequencing data

<sup>3</sup>Pearson's product-moment correlation calculated in R describing correlation between change in DNA methylation and change in RNA expression for genes with beta diff ≥ |0.3|

**Supplementary table 9. Genes with change in methylation ( $\beta$  diff  $\geq |0.3|$ ) at promoter sites and gene expression ( $\log_2$  fold change  $\geq |2|$ ) in *DIP2C*<sup>-/-</sup> #1-1 compared to RKO.**

|                       | Gene                   | DNA methylation<br>Beta diff | Log2 fold change<br>in expression |
|-----------------------|------------------------|------------------------------|-----------------------------------|
| <i>Hypomethylated</i> | CD44                   | -0.51                        | 3.42                              |
|                       | CDKN2A                 | -0.58                        | 4.19                              |
|                       | FBLN5                  | -0.31                        | 3.55                              |
|                       | FHL2                   | -0.34                        | 2.11                              |
|                       | GGT1                   | -0.30                        | 2.24                              |
|                       | GRPR                   | -0.37                        | -6.77                             |
|                       | LAMB3                  | -0.51                        | 3.91                              |
|                       | LGALS3BP               | -0.44                        | 2.11                              |
|                       | PDE4DIP                | -0.37                        | 4.71                              |
|                       | S100A16                | -0.44                        | 2.50                              |
|                       | SERPINE1               | -0.31                        | 2.60                              |
|                       | <i>Hypermethylated</i> | ADAMTSL1                     | 0.69                              |
| CDC42BPG              |                        | 0.41                         | -4.36                             |
| EPS8L2                |                        | 0.31                         | -3.73                             |
| FLVCR2                |                        | 0.33                         | -2.24                             |
| GADD45G               |                        | 0.36                         | -2.35                             |
| IRS1                  |                        | 0.73                         | -3.57                             |
| KCTD12                |                        | 0.30                         | -5.33                             |
| KRT80                 |                        | 0.74                         | -6.41                             |
| LGI2                  |                        | 0.39                         | -4.39                             |
| NUAK2                 |                        | 0.36                         | -2.25                             |
| RHOBTB1               |                        | 0.32                         | -4.10                             |
| ROR1                  |                        | 0.58                         | -4.86                             |
| RTKN2                 |                        | 0.43                         | -2.21                             |
| SLC1A3                |                        | 0.44                         | -6.66                             |
| SLC9A2                |                        | 0.34                         | -4.37                             |
| TJP3                  |                        | 0.31                         | -2.25                             |
| TMEM106A              |                        | 0.33                         | -2.89                             |
